# Supplementary material for: The Ongoing COVID-19 Epidemic Curves Indicate Initial Point Spread in China With Log-Normal Distribution of New Cases per Day With a Predictable Last Date of the Outbreak Version 3: Test for When After a Peak in Daily Cases the Predicted Equation Becomes Reliable and Use of the Derivative of the Equation to Detect Time of Key Changes Determining the Length of the Outbreak
Source: Preprints.org preprint supplement (doi:10.20944/preprints202003.0077.v3), 2020-03-27
Supplement: Supplementary file 3 [file corona model only S-Korea and italy.xlsx]

## Sheet: S Korea
		Start	A		B	C	Sume of Squares
		26.2369	735.205		1.54334	0.00252334	274892
Date	Day of year	Log Day since start	Model	Model corr	DATA	Square diff
2020-01-01	1	#NUM!	#NUM!	0	0	0
2020-01-02	2	#NUM!	#NUM!	0	0	0
2020-01-03	3	#NUM!	#NUM!	0	0	0
2020-01-04	4	#NUM!	#NUM!	0	0	0
2020-01-05	5	#NUM!	#NUM!	0	0	0
2020-01-06	6	#NUM!	#NUM!	0	0	0
2020-01-07	7	#NUM!	#NUM!	0	0	0
2020-01-08	8	#NUM!	#NUM!	0	0	0
2020-01-09	9	#NUM!	#NUM!	0	0	0
2020-01-10	10	#NUM!	#NUM!	0	0	0
2020-01-11	11	#NUM!	#NUM!	0	0	0
2020-01-12	12	#NUM!	#NUM!	0	0	0
2020-01-13	13	#NUM!	#NUM!	0	0	0
2020-01-14	14	#NUM!	#NUM!	0	0	0
2020-01-15	15	#NUM!	#NUM!	0	0	0
2020-01-16	16	#NUM!	#NUM!	0	0	0
2020-01-17	17	#NUM!	#NUM!	0	0	0
2020-01-18	18	#NUM!	#NUM!	0	0	0
2020-01-19	19	#NUM!	#NUM!	0	0	0
2020-01-20	20	#NUM!	#NUM!	0	0	0
2020-01-21	21	#NUM!	#NUM!	0	0	0
2020-01-22	22	#NUM!	#NUM!	0	0	0
2020-01-23	23	#NUM!	#NUM!	0	0	0
2020-01-24	24	#NUM!	#NUM!	0	0	0
2020-01-25	25	#NUM!	#NUM!	0	0	0
2020-01-26	26	#NUM!	#NUM!	0	0	0
2020-01-27	27	-0.117391	3.32638e-235	3.32638e-235	0	0
2020-01-28	28	0.246289	1.23283e-142	1.23283e-142	0	1.51986e-284
2020-01-29	29	0.441404	2.35408e-102	2.35408e-102	0	5.54167e-204
2020-01-30	30	0.575551	1.84082e-78	1.84082e-78	0	3.38863e-156
2020-01-31	31	0.677894	2.57433e-62	2.57433e-62	0	6.62717e-124
2020-02-01	32	0.76066	1.41059e-50	1.41059e-50	0	1.98975e-100
2020-02-02	33	0.830149	1.24346e-41	1.24346e-41	0	1.5462e-82
2020-02-03	34	0.890038	1.37173e-34	1.37173e-34	0	1.88163e-68
2020-02-04	35	0.94266	6.54449e-29	6.54449e-29	0	4.28304e-57
2020-02-05	36	0.98959	3.00704e-24	3.00704e-24	0	9.04226e-48
2020-02-06	37	1.03194	2.29087e-20	2.29087e-20	0	5.24808e-40
2020-02-07	38	1.07052	4.24622e-17	4.24622e-17	0	1.80304e-33
2020-02-08	39	1.10596	2.53222e-14	2.53222e-14	0	6.41214e-28
2020-02-09	40	1.13872	5.98794e-12	5.98794e-12	0	3.58555e-23
2020-02-10	41	1.16918	6.58809e-10	6.58809e-10	0	4.3403e-19
2020-02-11	42	1.19764	3.81992e-08	3.81992e-08	0	1.45918e-15
2020-02-12	43	1.22436	1.2883e-06	1.2883e-06	0	1.65971e-12
2020-02-13	44	1.24952	2.73575e-05	2.73575e-05	0	7.48434e-10
2020-02-14	45	1.27331	0.000390158	0.000390158	0	1.52223e-07
2020-02-15	46	1.29586	0.00394041	0.00394041	0	1.55268e-05
2020-02-16	47	1.31729	0.0294517	0.0294517	0	0.000867404
2020-02-17	48	1.33772	0.169037	0.169037	0	0.0285735
2020-02-18	49	1.35723	0.768595	0.768595	1	0.0535483
2020-02-19	50	1.3759	2.84302	2.84302	20	294.362
2020-02-20	51	1.39381	8.75182	8.75182	53	1957.9
2020-02-21	52	1.411	22.8643	22.8643	100	5949.92
2020-02-22	53	1.42754	51.5616	51.5616	229	31484.4
2020-02-23	54	1.44347	101.864	101.864	169	4507.22
2020-02-24	55	1.45884	178.591	178.591	231	2746.68
2020-02-25	56	1.47368	281.046	281.046	144	18781.6
2020-02-26	57	1.48803	400.987	400.987	284	13685.9
2020-02-27	58	1.50192	523.331	523.331	505	336.037
2020-02-28	59	1.51539	629.721	629.721	571	3448.13
2020-02-29	60	1.52844	703.565	703.565	813	11976.1
2020-03-01	61	1.54112	734.485	734.485	1062	107266
2020-03-02	62	1.55344	720.513	720.513	600	14523.3
2020-03-03	63	1.56541	667.562	667.562	516	22971
2020-03-04	64	1.57707	586.85	586.85	438	22156.4
2020-03-05	65	1.58842	491.534	491.534	518	700.475
2020-03-06	66	1.59948	393.736	393.736	483	7968.15
2020-03-07	67	1.61027	302.669	302.669	367	4138.51
2020-03-08	68	1.62079	223.973	223.973	248	577.312
2020-03-09	69	1.63107	160	160	131	841.019
2020-03-10	70	1.64111	110.63	110.63	242	17258.1
2020-03-11	71	1.65092	74.2137	74.2137	114	1582.95
2020-03-12	72	1.66052	48.4062	48.4062	110	3793.8
2020-03-13	73	1.6699	30.7605	30.7605	107	5812.46
2020-03-14	74	1.67909	19.0793	19.0793	76	3239.97
2020-03-15	75	1.68809	11.5703	11.5703	74	3897.47
2020-03-16	76	1.69691	6.871	6.871	84	5948.88
2020-03-17	77	1.70555	4.00146	4.00146	93	7920.74
2020-03-18	78	1.71402	2.28834	2.28834	152	22413.6
2020-03-19	79	1.72233	1.28667	1.28667	87	7346.78
2020-03-20	80	1.73048	0.712122	0.712122	147	21400.1
2020-03-21	81	1.73849	0.388372	0.388372	98	9528.03
2020-03-22	82	1.74635	0.208919	0.208919	64	4069.3
2020-03-23	83	1.75407	0.110955	0.110955
2020-03-24	84	1.76165	0.0582274	0.0582274
2020-03-25	85	1.76911	0.0302181	0.0302181
2020-03-26	86	1.77643	0.0155199	0.0155199
2020-03-27	87	1.78364	0.00789408	0.00789408
2020-03-28	88	1.79073	0.00397909	0.00397909
2020-03-29	89	1.7977	0.00198885	0.00198885
2020-03-30	90	1.80457	0.000986291	0.000986291
2020-03-31	91	1.81133	0.00048554	0.00048554
2020-04-01	92	1.81798	0.0002374	0.0002374
2020-04-02	93	1.82454	0.000115339	0.000115339
2020-04-03	94	1.83099	5.57059e-05	5.57059e-05
2020-04-04	95	1.83736	2.67571e-05	2.67571e-05
2020-04-05	96	1.84363	1.27867e-05	1.27867e-05

## Sheet: Italy
		Start	A			B	C	Sume of Squares
		0	5656.33			1.92776	0.0030201	5.84293e+06
Date	Day of year	Log Day since start	Model	Model corr	Acceleration	italy	Square diff	Cumulative
2020-01-01	1	0	3.54864e-264	3.54864e-264			0	3.54864e-264
2020-01-02	2	0.30103	3.05164e-187	3.05164e-187	3.05164e-187		0	3.05164e-187
2020-01-03	3	0.477121	2.80182e-148	2.80182e-148	2.80182e-148		7.85019e-296	2.80182e-148
2020-01-04	4	0.60206	2.44262e-123	2.44262e-123	2.44262e-123		5.96637e-246	2.44262e-123
2020-01-05	5	0.69897	1.5393e-105	1.5393e-105	1.5393e-105		2.36946e-210	1.5393e-105
2020-01-06	6	0.778151	5.34601e-92	5.34601e-92	5.34601e-92		2.85798e-183	5.34601e-92
2020-01-07	7	0.845098	2.97264e-81	2.97264e-81	2.97264e-81		8.83657e-162	2.97264e-81
2020-01-08	8	0.90309	1.81982e-72	1.81982e-72	1.81982e-72		3.31176e-144	1.81982e-72
2020-01-09	9	0.954243	4.06622e-65	4.06622e-65	4.06622e-65		1.65341e-129	4.06622e-65
2020-01-10	10	1	7.31823e-59	7.31823e-59	7.31823e-59		5.35566e-117	7.31824e-59
2020-01-11	11	1.04139	1.83469e-53	1.83469e-53	1.83469e-53		3.3661e-106	1.8347e-53
2020-01-12	12	1.07918	9.49448e-49	9.49448e-49	9.49429e-49		9.01451e-97	9.49466e-49
2020-01-13	13	1.11394	1.35678e-44	1.35678e-44	1.35669e-44		1.84086e-88	1.35688e-44
2020-01-14	14	1.14613	6.67659e-41	6.67659e-41	6.67524e-41		4.45769e-81	6.67795e-41
2020-01-15	15	1.17609	1.34238e-37	1.34238e-37	1.34171e-37		1.80199e-74	1.34305e-37
2020-01-16	16	1.20412	1.26199e-34	1.26199e-34	1.26065e-34		1.59262e-68	1.26333e-34
2020-01-17	17	1.23045	6.18054e-32	6.18054e-32	6.16792e-32		3.81991e-63	6.19318e-32
2020-01-18	18	1.25527	1.72147e-29	1.72147e-29	1.71529e-29		2.96346e-58	1.72766e-29
2020-01-19	19	1.27875	2.93088e-27	2.93088e-27	2.91366e-27		8.59005e-54	2.94816e-27
2020-01-20	20	1.30103	3.23847e-25	3.23847e-25	3.20916e-25		1.04877e-49	3.26795e-25
2020-01-21	21	1.32222	2.442e-23	2.442e-23	2.40961e-23		5.96336e-46	2.47468e-23
2020-01-22	22	1.34242	1.3112e-21	1.3112e-21	1.28678e-21		1.71924e-42	1.33595e-21
2020-01-23	23	1.36173	5.19805e-20	5.19805e-20	5.06693e-20		2.70198e-39	5.33165e-20
2020-01-24	24	1.38021	1.56951e-18	1.56951e-18	1.51753e-18		2.46337e-36	1.62283e-18
2020-01-25	25	1.39794	3.70771e-17	3.70771e-17	3.55076e-17		1.37471e-33	3.87e-17
2020-01-26	26	1.41497	7.01461e-16	7.01461e-16	6.64384e-16		4.92048e-31	7.40161e-16
2020-01-27	27	1.43136	1.08471e-14	1.08471e-14	1.01457e-14		1.1766e-28	1.15873e-14
2020-01-28	28	1.44716	1.39579e-13	1.39579e-13	1.28732e-13		1.94823e-26	1.51166e-13
2020-01-29	29	1.4624	1.51838e-12	1.51838e-12	1.3788e-12		2.30548e-24	1.66955e-12
2020-01-30	30	1.47712	1.41604e-11	1.41604e-11	1.26421e-11		2.00518e-22	1.583e-11
2020-01-31	31	1.49136	1.14635e-10	1.14635e-10	1.00475e-10		1.31413e-20	1.30465e-10
2020-02-01	32	1.50515	8.14582e-10	8.14582e-10	6.99946e-10		6.63543e-19	9.45047e-10
2020-02-02	33	1.51851	5.1316e-09	5.1316e-09	4.31702e-09		2.63333e-17	6.07665e-09
2020-02-03	34	1.53148	2.89177e-08	2.89177e-08	2.37861e-08		8.36234e-16	3.49944e-08
2020-02-04	35	1.54407	1.46952e-07	1.46952e-07	1.18034e-07		2.15949e-14	1.81946e-07
2020-02-05	36	1.5563	6.7836e-07	6.7836e-07	5.31408e-07		4.60172e-13	8.60306e-07	Predicted curve for new cases per day and acceleration in new cases per day
2020-02-06	37	1.5682	2.86349e-06	2.86349e-06	2.18513e-06		8.19956e-12	3.72379e-06	Acceleration stops accelerating day 70 as seen from this curve
2020-02-07	38	1.57978	1.11198e-05	1.11198e-05	8.2563e-06		1.2365e-10	1.48436e-05	Day 70 is March 10 when whole italy was lockdown
2020-02-08	39	1.59106	3.99436e-05	3.99436e-05	2.88238e-05		1.59549e-09	5.47872e-05	Total length of outbreak predicted when quarantaine was introduced on day 19 of the outbreak is 93 days
2020-02-09	40	1.60206	0.000133391	0.000133391	9.34472e-05		1.77931e-08	0.000188178	and 74 days needed for the lockdown
2020-02-10	41	1.61278	0.000416032	0.000416032	0.000282641		1.73082e-07	0.00060421
2020-02-11	42	1.62325	0.00121696	0.00121696	0.000800932		1.481e-06	0.00182117
2020-02-12	43	1.63347	0.00335167	0.00335167	0.00213471		1.12337e-05	0.00517284
2020-02-13	44	1.64345	0.0087222	0.0087222	0.00537053		7.60768e-05	0.013895
2020-02-14	45	1.65321	0.0215179	0.0215179	0.0127957		0.000463022	0.035413
2020-02-15	46	1.66276	0.0504785	0.0504785	0.0289605		0.00254807	0.0858914
2020-02-16	47	1.6721	0.112918	0.112918	0.0624399		0.0127506	0.19881
2020-02-17	48	1.68124	0.241496	0.241496	0.128578		0.0583204	0.440306
2020-02-18	49	1.6902	0.494989	0.494989	0.253493		0.245014	0.935295
2020-02-19	50	1.69897	0.974539	0.974539	0.479551		0.949727	1.90983
2020-02-20	51	1.70757	1.84686	1.84686	0.872319		3.41089	3.75669
2020-02-21	52	1.716	3.37558	3.37558	1.52872	17	185.625	7.13227
2020-02-22	53	1.72428	5.96125	5.96125	2.58567	59	2813.11	13.0935
2020-02-23	54	1.73239	10.1893	10.1893	4.22802	71	3697.94	23.2828
2020-02-24	55	1.74036	16.8834	16.8834	6.69411	77	3614.01	40.1662
2020-02-25	56	1.74819	27.1605	27.1605	10.2771	93	4334.85	67.3266
2020-02-26	57	1.75587	42.4802	42.4802	15.3198	125	6809.51	109.807
2020-02-27	58	1.76343	64.6817	64.6817	22.2015	205	19689.2	174.489
2020-02-28	59	1.77085	95.9976	95.9976	31.3159	238	20164.7	270.486
2020-02-29	60	1.77815	139.037	139.037	43.0392	240	10193.6	409.523
2020-03-01	61	1.78533	196.729	196.729	57.6918	566	136361	606.252
2020-03-02	62	1.79239	272.222	272.222	75.4936	342	4868.93	878.474
2020-03-03	63	1.79934	368.742	368.742	96.5196	466	9459.14	1247.22
2020-03-04	64	1.80618	489.401	489.401	120.659	587	9525.5	1736.62
2020-03-05	65	1.81291	636.987	636.987	147.586	769	17427.4	2373.6
2020-03-06	66	1.81954	813.724	813.724	176.737	778	1276.21	3187.33
2020-03-07	67	1.82607	1021.04	1021.04	207.319	1246	50605.4	4208.37
2020-03-08	68	1.83251	1259.37	1259.37	238.326	1492	54116.8	5467.74
2020-03-09	69	1.83885	1527.95	1527.95	268.579	1797	72388.5	6995.69
2020-03-10	70	1.8451	1824.74	1824.74	296.787	977	718656	8820.43
2020-03-11	71	1.85126	2146.35	2146.35	321.617	2313	27771.2	10966.8
2020-03-12	72	1.85733	2488.13	2488.13	341.777	2651	26526.7	13454.9
2020-03-13	73	1.86332	2844.22	2844.22	356.092	2547	88340.9	16299.1
2020-03-14	74	1.86923	3207.81	3207.81	363.584	3497	83633	19506.9
2020-03-15	75	1.87506	3571.34	3571.34	363.535	3590	348.143	23078.3
2020-03-16	76	1.88081	3926.87	3926.87	355.531	3233	481459	27005.2
2020-03-17	77	1.88649	4266.37	4266.37	339.493	3526	548142	31271.5
2020-03-18	78	1.89209	4582.05	4582.05	315.679	4207	140659	35853.6
2020-03-19	79	1.89763	4866.71	4866.71	284.668	5322	207286	40720.3
2020-03-20	80	1.90309	5114.04	5114.04	247.326	5986	760316	45834.3
2020-03-21	81	1.90849	5318.79	5318.79	204.753	6557	1.53316e+06	51153.1
2020-03-22	82	1.91381	5477.02	5477.02	158.224	5560	6886.41	56630.1
2020-03-23	83	1.91908	5586.13	5586.13	109.115	4789	635418	62216.3
2020-03-24	84	1.92428	5644.97	5644.97	58.8424	5249	156795	67861.2
2020-03-25	85	1.92942	5653.76	5653.76	8.78751		3.1965e+07	73515
2020-03-26	86	1.9345	5614.01	5614.01	-39.7556			79129
2020-03-27	87	1.93952	5528.37	5528.37	-85.6313			84657.4
2020-03-28	88	1.94448	5400.52	5400.52	-127.859			90057.9
2020-03-29	89	1.94939	5234.86	5234.86	-165.656			95292.7
2020-03-30	90	1.95424	5036.41	5036.41	-198.452			100329
2020-03-31	91	1.95904	4810.52	4810.52	-225.888			105140
2020-04-01	92	1.96379	4562.71	4562.71	-247.804			109702
2020-04-02	93	1.96848	4298.49	4298.49	-264.227			114001
2020-04-03	94	1.97313	4023.15	4023.15	-275.341			118024
2020-04-04	95	1.97772	3741.68	3741.68	-281.465			121766
2020-04-05	96	1.98227	3458.66	3458.66	-283.021			125224
2020-04-06	97	1.98677	3178.16	3178.16	-280.505			128403
2020-04-07	98	1.99123	2903.7	2903.7	-274.46			131306
2020-04-08	99	1.99564	2638.25	2638.25	-265.449			133944
2020-04-09	100	2	2384.21	2384.21	-254.036			136329
2020-04-10	101	2.00432	2143.45	2143.45	-240.765			138472
2020-04-11	102	2.0086	1917.3	1917.3	-226.146			140389
2020-04-12	103	2.01284	1706.66	1706.66	-210.645			142096
2020-04-13	104	2.01703	1511.98	1511.98	-194.677			143608
2020-04-14	105	2.02119	1333.38	1333.38	-178.602			144941
2020-04-15	106	2.02531	1170.66	1170.66	-162.721			146112
2020-04-16	107	2.02938	1023.37	1023.37	-147.284			147135
2020-04-17	108	2.03342	890.888	890.888	-132.484			148026
2020-04-18	109	2.03743	772.419	772.419	-118.469			148799
2020-04-19	110	2.04139	667.077	667.077	-105.342			149466
2020-04-20	111	2.04532	573.91	573.91	-93.1668			150040
2020-04-21	112	2.04922	491.933	491.933	-81.9768			150532
2020-04-22	113	2.05308	420.156	420.156	-71.7769			150952
2020-04-23	114	2.0569	357.606	357.606	-62.5507			151309
2020-04-24	115	2.0607	303.341	303.341	-54.2646			151613
2020-04-25	116	2.06446	256.469	256.469	-46.8721			151869
2020-04-26	117	2.06819	216.151	216.151	-40.318			152085
2020-04-27	118	2.07188	181.61	181.61	-34.5414			152267
2020-04-28	119	2.07555	152.131	152.131	-29.4783			152419
2020-04-29	120	2.07918	127.068	127.068	-25.0637			152546
2020-04-30	121	2.08279	105.834	105.834	-21.2339			152652
2020-05-01	122	2.08636	87.9068	87.9068	-17.927			152740
2020-05-02	123	2.08991	72.8221	72.8221	-15.0846			152813
2020-05-03	124	2.09342	60.1701	60.1701	-12.652			152873
2020-05-04	125	2.09691	49.5915	49.5915	-10.5786			152923
2020-05-05	126	2.10037	40.7731	40.7731	-8.8184			152963
2020-05-06	127	2.1038	33.4434	33.4434	-7.32968			152997
2020-05-07	128	2.10721	27.3683	27.3683	-6.07513			153024
2020-05-08	129	2.11059	22.3467	22.3467	-5.0216			153046
2020-05-09	130	2.11394	18.2069	18.2069	-4.13984			153065
2020-05-10	131	2.11727	14.8027	14.8027	-3.4042			153079
2020-05-11	132	2.12057	12.0103	12.0103	-2.79237			153091
2020-05-12	133	2.12385	9.72527	9.72527	-2.28502			153101
2020-05-13	134	2.1271	7.85975	7.85975	-1.86552			153109
2020-05-14	135	2.13033	6.34014	6.34014	-1.51961			153115
2020-05-15	136	2.13354	5.10499	5.10499	-1.23515			153121
2020-05-16	137	2.13672	4.10316	4.10316	-1.00182			153125
2020-05-17	138	2.13988	3.29225	3.29225	-0.810911			153128
2020-05-18	139	2.14301	2.63717	2.63717	-0.655078			153131
2020-05-19	140	2.14613	2.109	2.109	-0.528175			153133
2020-05-20	141	2.14922	1.68394	1.68394	-0.425062			153134
2020-05-21	142	2.15229	1.34248	1.34248	-0.34146			153136
2020-05-22	143	2.15534	1.06866	1.06866	-0.273821			153137
2020-05-23	144	2.15836	0.84945	0.84945	-0.219206			153138
2020-05-24	145	2.16137	0.674255	0.674255	-0.175195			153138
2020-05-25	146	2.16435	0.534459	0.534459	-0.139796			153139
2020-05-26	147	2.16732	0.423082	0.423082	-0.111376			153139
2020-05-27	148	2.17026	0.334482	0.334482	-0.0886003			153140
2020-05-28	149	2.17319	0.264103	0.264103	-0.0703787			153140
2020-05-29	150	2.17609	0.208278	0.208278	-0.0558252			153140
2020-05-30	151	2.17898	0.164058	0.164058	-0.0442202			153140
2020-05-31	152	2.18184	0.129077	0.129077	-0.0349808			153140
2020-06-01	153	2.18469	0.101441	0.101441	-0.027636			153140
2020-06-02	154	2.18752	0.0796353	0.0796353	-0.0218058			153141
2020-06-03	155	2.19033	0.0624508	0.0624508	-0.0171846			153141
2020-06-04	156	2.19312	0.0489242	0.0489242	-0.0135266			153141
2020-06-05	157	2.1959	0.0382891	0.0382891	-0.010635			153141
2020-06-06	158	2.19866	0.0299369	0.0299369	-0.00835225			153141
2020-06-07	159	2.2014	0.0233845	0.0233845	-0.00655234			153141
2020-06-08	160	2.20412	0.0182496	0.0182496	-0.00513491			153141
2020-06-09	161	2.20683	0.0142296	0.0142296	-0.00401999			153141
2020-06-10	162	2.20952	0.0110856	0.0110856	-0.00314402			153141
2020-06-11	163	2.21219	0.00862905	0.00862905	-0.00245657			153141
2020-06-12	164	2.21484	0.00671141	0.00671141	-0.00191764			153141
2020-06-13	165	2.21748	0.00521582	0.00521582	-0.00149559			153141
2020-06-14	166	2.22011	0.00405041	0.00405041	-0.0011654			153141
2020-06-15	167	2.22272	0.00314308	0.00314308	-0.000907339			153141
2020-06-16	168	2.22531	0.00243724	0.00243724	-0.000705836			153141
2020-06-17	169	2.22789	0.0018886	0.0018886	-0.000548644			153141
2020-06-18	170	2.23045	0.00146247	0.00146247	-0.000426128			153141
2020-06-19	171	2.233	0.00113175	0.00113175	-0.000330721			153141
2020-06-20	172	2.23553	0.000875259	0.000875259	-0.000256488			153141
2020-06-21	173	2.23805	0.000676482	0.000676482	-0.000198776			153141
2020-06-22	174	2.24055	0.000522538	0.000522538	-0.000153944			153141
2020-06-23	175	2.24304	0.000403393	0.000403393	-0.000119145			153141
2020-06-24	176	2.24551	0.000311241	0.000311241	-9.21524e-05			153141
2020-06-25	177	2.24797	0.00024001	0.00024001	-7.12307e-05			153141
2020-06-26	178	2.25042	0.000184984	0.000184984	-5.50257e-05			153141
2020-06-27	179	2.25285	0.000142502	0.000142502	-4.24825e-05			153141
2020-06-28	180	2.25527	0.000109722	0.000109722	-3.278e-05			153141
2020-06-29	181	2.25768	8.44422e-05	8.44422e-05	-2.52796e-05			153141
2020-06-30	182	2.26007	6.49572e-05	6.49572e-05	-1.9485e-05			153141
2020-07-01	183	2.26245	4.99463e-05	4.99463e-05	-1.5011e-05			153141
2020-07-02	184	2.26482	3.83878e-05	3.83878e-05	-1.15585e-05			153141
2020-07-03	185	2.26717	2.94919e-05	2.94919e-05	-8.89584e-06			153141
2020-07-04	186	2.26951	2.26485e-05	2.26485e-05	-6.84338e-06			153141
2020-07-05	187	2.27184	1.73864e-05	1.73864e-05	-5.26211e-06			153141
2020-07-06	188	2.27416	1.33419e-05	1.33419e-05	-4.04448e-06			153141
2020-07-07	189	2.27646	1.02346e-05	1.02346e-05	-3.1073e-06			153141
2020-07-08	190	2.27875	7.84832e-06	7.84832e-06	-2.38632e-06			153141
2020-07-09	191	2.28103	6.0164e-06	6.0164e-06	-1.83192e-06			153141
2020-07-10	192	2.2833	4.6106e-06	4.6106e-06	-1.4058e-06			153141
2020-07-11	193	2.28556	3.5322e-06	3.5322e-06	-1.0784e-06			153141
2020-07-12	194	2.2878	2.70523e-06	2.70523e-06	-8.26967e-07			153141
2020-07-13	195	2.29003	2.07129e-06	2.07129e-06	-6.33943e-07			153141
2020-07-14	196	2.29226	1.58547e-06	1.58547e-06	-4.85817e-07			153141
2020-07-15	197	2.29447	1.21329e-06	1.21329e-06	-3.72187e-07			153141
2020-07-16	198	2.29667	9.28237e-07	9.28237e-07	-2.85049e-07			153141
2020-07-17	199	2.29885	7.09987e-07	7.09987e-07	-2.1825e-07			153141
2020-07-18	200	2.30103	5.42928e-07	5.42928e-07	-1.67059e-07			153141
2020-07-19	201	2.3032	4.15086e-07	4.15086e-07	-1.27841e-07			153141
2020-07-20	202	2.30535	3.17281e-07	3.17281e-07	-9.78055e-08			153141
2020-07-21	203	2.3075	2.42473e-07	2.42473e-07	-7.48084e-08			153141
2020-07-22	204	2.30963	1.85267e-07	1.85267e-07	-5.72054e-08			153141
2020-07-23	205	2.31175	1.41532e-07	1.41532e-07	-4.37348e-08			153141
2020-07-24	206	2.31387	1.08103e-07	1.08103e-07	-3.34292e-08			153141
2020-07-25	207	2.31597	8.25563e-08	8.25563e-08	-2.55469e-08			153141
2020-07-26	208	2.31806	6.30369e-08	6.30369e-08	-1.95194e-08			153141
2020-07-27	209	2.32015	4.81255e-08	4.81255e-08	-1.49113e-08			153141
2020-07-28	210	2.32222	3.67364e-08	3.67364e-08	-1.13891e-08			153141
2020-07-29	211	2.32428	2.80389e-08	2.80389e-08	-8.69749e-09			153141
2020-07-30	212	2.32634	2.1398e-08	2.1398e-08	-6.64093e-09			153141
2020-07-31	213	2.32838	1.63281e-08	1.63281e-08	-5.06991e-09			153141
2020-08-01	214	2.33041	1.24581e-08	1.24581e-08	-3.87001e-09			153141
2020-08-02	215	2.33244	9.50435e-09	9.50435e-09	-2.9537e-09			153141
2020-08-03	216	2.33445	7.25028e-09	7.25028e-09	-2.25407e-09			153141
2020-08-04	217	2.33646	5.53032e-09	5.53032e-09	-1.71996e-09			153141
2020-08-05	218	2.33846	4.21805e-09	4.21805e-09	-1.31227e-09			153141
2020-08-06	219	2.34044	3.21693e-09	3.21693e-09	-1.00112e-09			153141
2020-08-07	220	2.34242	2.45327e-09	2.45327e-09	-7.63669e-10			153141
2020-08-08	221	2.34439	1.87077e-09	1.87077e-09	-5.82491e-10			153141
2020-08-09	222	2.34635	1.42651e-09	1.42651e-09	-4.44261e-10			153141
2020-08-10	223	2.3483	1.0877e-09	1.0877e-09	-3.3881e-10			153141
2020-08-11	224	2.35025	8.2933e-10	8.2933e-10	-2.58373e-10			153141
2020-08-12	225	2.35218	6.3231e-10	6.3231e-10	-1.9702e-10			153141
2020-08-13	226	2.35411	4.82081e-10	4.82081e-10	-1.50229e-10			153141
2020-08-14	227	2.35603	3.67537e-10	3.67537e-10	-1.14544e-10			153141
2020-08-15	228	2.35793	2.80204e-10	2.80204e-10	-8.7333e-11			153141
2020-08-16	229	2.35984	2.1362e-10	2.1362e-10	-6.65836e-11			153141
2020-08-17	230	2.36173	1.62858e-10	1.62858e-10	-5.07626e-11			153141
2020-08-18	231	2.36361	1.24158e-10	1.24158e-10	-3.87e-11			153141
2020-08-19	232	2.36549	9.46543e-11	9.46543e-11	-2.95033e-11			153141
2020-08-20	233	2.36736	7.21625e-11	7.21625e-11	-2.24918e-11			153141
2020-08-21	234	2.36922	5.50159e-11	5.50159e-11	-1.71465e-11			153141
2020-08-22	235	2.37107	4.19444e-11	4.19444e-11	-1.30716e-11			153141
2020-08-23	236	2.37291	3.19793e-11	3.19793e-11	-9.96506e-12			153141
2020-08-24	237	2.37475	2.43824e-11	2.43824e-11	-7.5969e-12			153141
2020-08-25	238	2.37658	1.85908e-11	1.85908e-11	-5.7916e-12			153141
2020-08-26	239	2.3784	1.41754e-11	1.41754e-11	-4.41539e-12			153141
2020-08-27	240	2.38021	1.08092e-11	1.08092e-11	-3.36627e-12			153141
2020-08-28	241	2.38202	8.24266e-12	8.24266e-12	-2.5665e-12			153141
2020-08-29	242	2.38382	6.28585e-12	6.28585e-12	-1.95681e-12			153141
2020-08-30	243	2.38561	4.79385e-12	4.79385e-12	-1.49201e-12			153141
2020-08-31	244	2.38739	3.65619e-12	3.65619e-12	-1.13765e-12			153141
2020-09-01	245	2.38917	2.78869e-12	2.78869e-12	-8.67501e-13			153141
2020-09-02	246	2.39094	2.12716e-12	2.12716e-12	-6.61532e-13			153141
2020-09-03	247	2.3927	1.62267e-12	1.62267e-12	-5.04492e-13			153141
2020-09-04	248	2.39445	1.23791e-12	1.23791e-12	-3.84754e-13			153141
2020-09-05	249	2.3962	9.44461e-13	9.44461e-13	-2.93453e-13			153141
2020-09-06	250	2.39794	7.20629e-13	7.20629e-13	-2.23831e-13			153141
2020-09-07	251	2.39967	5.4989e-13	5.4989e-13	-1.70739e-13			153141
2020-09-08	252	2.4014	4.1964e-13	4.1964e-13	-1.3025e-13			153141
2020-09-09	253	2.40312	3.20271e-13	3.20271e-13	-9.93697e-14			153141
2020-09-10	254	2.40483	2.44454e-13	2.44454e-13	-7.58167e-14			153141
2020-09-11	255	2.40654	1.86603e-13	1.86603e-13	-5.7851e-14			153141
2020-09-12	256	2.40824	1.42457e-13	1.42457e-13	-4.41463e-14			153141
2020-09-13	257	2.40993	1.08765e-13	1.08765e-13	-3.36912e-14			153141
2020-09-14	258	2.41162	8.30508e-14	8.30508e-14	-2.57145e-14			153141
2020-09-15	259	2.4133	6.34226e-14	6.34226e-14	-1.96283e-14			153141
2020-09-16	260	2.41497	4.84386e-14	4.84386e-14	-1.4984e-14			153141
2020-09-17	261	2.41664	3.69988e-14	3.69988e-14	-1.14398e-14			153141
2020-09-18	262	2.4183	2.8264e-14	2.8264e-14	-8.73477e-15			153141
2020-09-19	263	2.41996	2.15939e-14	2.15939e-14	-6.6701e-15			153141
2020-09-20	264	2.4216	1.64999e-14	1.64999e-14	-5.09402e-15			153141
2020-09-21	265	2.42325	1.26091e-14	1.26091e-14	-3.89079e-15			153141
2020-09-22	266	2.42488	9.63702e-15	9.63702e-15	-2.97211e-15			153141
2020-09-23	267	2.42651	7.36641e-15	7.36641e-15	-2.27061e-15			153141
2020-09-24	268	2.42813	5.63152e-15	5.63152e-15	-1.73489e-15			153141
2020-09-25	269	2.42975	4.30579e-15	4.30579e-15	-1.32573e-15			153141
2020-09-26	270	2.43136	3.29259e-15	3.29259e-15	-1.01319e-15			153141
2020-09-27	271	2.43297	2.51816e-15	2.51816e-15	-7.74436e-16			153141
2020-09-28	272	2.43457	1.92614e-15	1.92614e-15	-5.92017e-16			153141
2020-09-29	273	2.43616	1.47351e-15	1.47351e-15	-4.52627e-16			153141
2020-09-30	274	2.43775	1.12741e-15	1.12741e-15	-3.46102e-16			153141
2020-10-01	275	2.43933	8.62729e-16	8.62729e-16	-2.64684e-16			153141
2020-10-02	276	2.44091	6.60282e-16	6.60282e-16	-2.02447e-16			153141
2020-10-03	277	2.44248	5.05417e-16	5.05417e-16	-1.54866e-16			153141
2020-10-04	278	2.44404	3.86932e-16	3.86932e-16	-1.18484e-16			153141
2020-10-05	279	2.4456	2.96269e-16	2.96269e-16	-9.0663e-17			153141
2020-10-06	280	2.44716	2.26885e-16	2.26885e-16	-6.93845e-17			153141
2020-10-07	281	2.44871	1.73777e-16	1.73777e-16	-5.3108e-17			153141
2020-10-08	282	2.45025	1.33121e-16	1.33121e-16	-4.06557e-17			153141
2020-10-09	283	2.45179	1.01993e-16	1.01993e-16	-3.11279e-17			153141
2020-10-10	284	2.45332	7.81564e-17	7.81564e-17	-2.38366e-17			153141
2020-10-11	285	2.45484	5.99004e-17	5.99004e-17	-1.82561e-17			153141
2020-10-12	286	2.45637	4.59162e-17	4.59162e-17	-1.39842e-17			153141
2020-10-13	287	2.45788	3.52025e-17	3.52025e-17	-1.07136e-17			153141
2020-10-14	288	2.45939	2.69932e-17	2.69932e-17	-8.20931e-18			153141
2020-10-15	289	2.4609	2.07018e-17	2.07018e-17	-6.29139e-18			153141
2020-10-16	290	2.4624	1.58795e-17	1.58795e-17	-4.82233e-18			153141
2020-10-17	291	2.46389	1.21826e-17	1.21826e-17	-3.69692e-18			153141
2020-10-18	292	2.46538	9.34796e-18	9.34796e-18	-2.83462e-18			153141
2020-10-19	293	2.46687	7.17415e-18	7.17415e-18	-2.17382e-18			153141
2020-10-20	294	2.46835	5.50681e-18	5.50681e-18	-1.66734e-18			153141
2020-10-21	295	2.46982	4.22772e-18	4.22772e-18	-1.27909e-18			153141
2020-10-22	296	2.47129	3.24631e-18	3.24631e-18	-9.81411e-19			153141
2020-10-23	297	2.47276	2.49317e-18	2.49317e-18	-7.53142e-19			153141
2020-10-24	298	2.47422	1.9151e-18	1.9151e-18	-5.78068e-19			153141
2020-10-25	299	2.47567	1.47133e-18	1.47133e-18	-4.43769e-19			153141
2020-10-26	300	2.47712	1.1306e-18	1.1306e-18	-3.40732e-19			153141
2020-10-27	301	2.47857	8.68933e-19	8.68933e-19	-2.61665e-19			153141
2020-10-28	302	2.48001	6.67951e-19	6.67951e-19	-2.00982e-19			153141
2020-10-29	303	2.48144	5.13551e-19	5.13551e-19	-1.544e-19			153141
2020-10-30	304	2.48287	3.94915e-19	3.94915e-19	-1.18636e-19			153141
2020-10-31	305	2.4843	3.03743e-19	3.03743e-19	-9.11726e-20			153141
2020-11-01	306	2.48572	2.33663e-19	2.33663e-19	-7.00798e-20			153141
2020-11-02	307	2.48714	1.79786e-19	1.79786e-19	-5.38768e-20			153141
2020-11-03	308	2.48855	1.38358e-19	1.38358e-19	-4.14277e-20			153141
2020-11-04	309	2.48996	1.06497e-19	1.06497e-19	-3.18612e-20			153141
2020-11-05	310	2.49136	8.19888e-20	8.19888e-20	-2.45084e-20			153141
2020-11-06	311	2.49276	6.31328e-20	6.31328e-20	-1.8856e-20			153141
2020-11-07	312	2.49415	4.86228e-20	4.86228e-20	-1.451e-20			153141
2020-11-08	313	2.49554	3.74549e-20	3.74549e-20	-1.11678e-20			153141
2020-11-09	314	2.49693	2.88578e-20	2.88578e-20	-8.59711e-21			153141
2020-11-10	315	2.49831	2.22384e-20	2.22384e-20	-6.61942e-21			153141
2020-11-11	316	2.49969	1.71407e-20	1.71407e-20	-5.09767e-21			153141
2020-11-12	317	2.50106	1.32142e-20	1.32142e-20	-3.92652e-21			153141
2020-11-13	318	2.50243	1.01892e-20	1.01892e-20	-3.02503e-21			153141
2020-11-14	319	2.50379	7.85822e-21	7.85822e-21	-2.33096e-21			153141
2020-11-15	320	2.50515	6.06172e-21	6.06172e-21	-1.7965e-21			153141
2020-11-16	321	2.50651	4.67687e-21	4.67687e-21	-1.38485e-21			153141
2020-11-17	322	2.50786	3.60913e-21	3.60913e-21	-1.06774e-21			153141
2020-11-18	323	2.5092	2.78571e-21	2.78571e-21	-8.23412e-22			153141
2020-11-19	324	2.51055	2.1506e-21	2.1506e-21	-6.35116e-22			153141
2020-11-20	325	2.51188	1.66062e-21	1.66062e-21	-4.89978e-22			153141
2020-11-21	326	2.51322	1.28254e-21	1.28254e-21	-3.78083e-22			153141
2020-11-22	327	2.51455	9.90736e-22	9.90736e-22	-2.918e-22			153141
2020-11-23	328	2.51587	7.65482e-22	7.65482e-22	-2.25253e-22			153141
2020-11-24	329	2.5172	5.91564e-22	5.91564e-22	-1.73918e-22			153141
2020-11-25	330	2.51851	4.57255e-22	4.57255e-22	-1.3431e-22			153141
2020-11-26	331	2.51983	3.53512e-22	3.53512e-22	-1.03743e-22			153141
2020-11-27	332	2.52114	2.73363e-22	2.73363e-22	-8.01488e-23			153141
2020-11-28	333	2.52244	2.1143e-22	2.1143e-22	-6.19334e-23			153141
2020-11-29	334	2.52375	1.63562e-22	1.63562e-22	-4.78677e-23			153141
2020-11-30	335	2.52504	1.26558e-22	1.26558e-22	-3.70041e-23			153141
2020-12-01	336	2.52634	9.79459e-23	9.79459e-23	-2.86119e-23			153141
2020-12-02	337	2.52763	7.58184e-23	7.58184e-23	-2.21275e-23			153141
2020-12-03	338	2.52892	5.87022e-23	5.87022e-23	-1.71163e-23			153141
2020-12-04	339	2.5302	4.54595e-23	4.54595e-23	-1.32427e-23			153141
2020-12-05	340	2.53148	3.52117e-23	3.52117e-23	-1.02478e-23			153141
2020-12-06	341	2.53275	2.72798e-23	2.72798e-23	-7.93194e-24			153141
2020-12-07	342	2.53403	2.11391e-23	2.11391e-23	-6.1407e-24			153141
2020-12-08	343	2.53529	1.63841e-23	1.63841e-23	-4.75496e-24			153141
2020-12-09	344	2.53656	1.27014e-23	1.27014e-23	-3.6827e-24			153141
2020-12-10	345	2.53782	9.84857e-24	9.84857e-24	-2.85284e-24			153141
2020-12-11	346	2.53908	7.63812e-24	7.63812e-24	-2.21045e-24			153141
2020-12-12	347	2.54033	5.92505e-24	5.92505e-24	-1.71307e-24			153141
2020-12-13	348	2.54158	4.59717e-24	4.59717e-24	-1.32788e-24			153141
2020-12-14	349	2.54283	3.56764e-24	3.56764e-24	-1.02953e-24			153141
2020-12-15	350	2.54407	2.76926e-24	2.76926e-24	-7.98376e-25			153141
2020-12-16	351	2.54531	2.15001e-24	2.15001e-24	-6.19254e-25			153141
2020-12-17	352	2.54654	1.66959e-24	1.66959e-24	-4.80421e-25			153141
